# Supplementary material
Source: Springer Nature journal article supplement (https://www.springermedizin.de/resource/supplementary/12885_2014_4791_MOESM4_ESM.pdf/9467270)

**A** MDA-MB-231 wt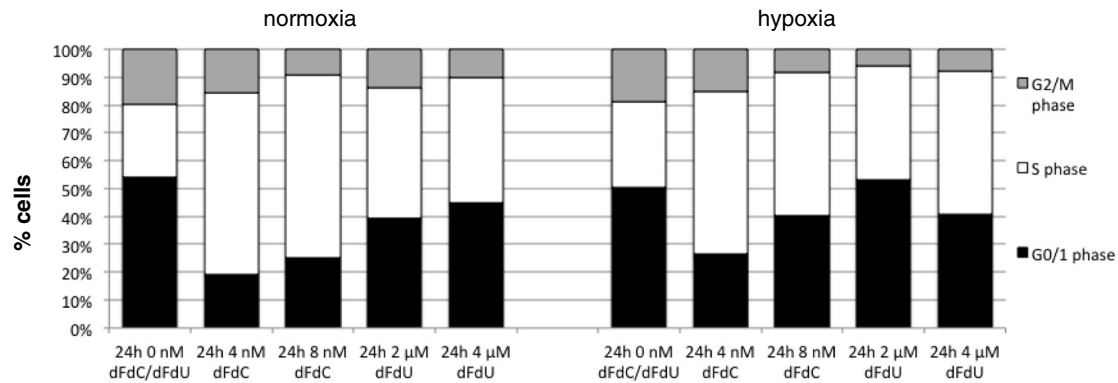**B**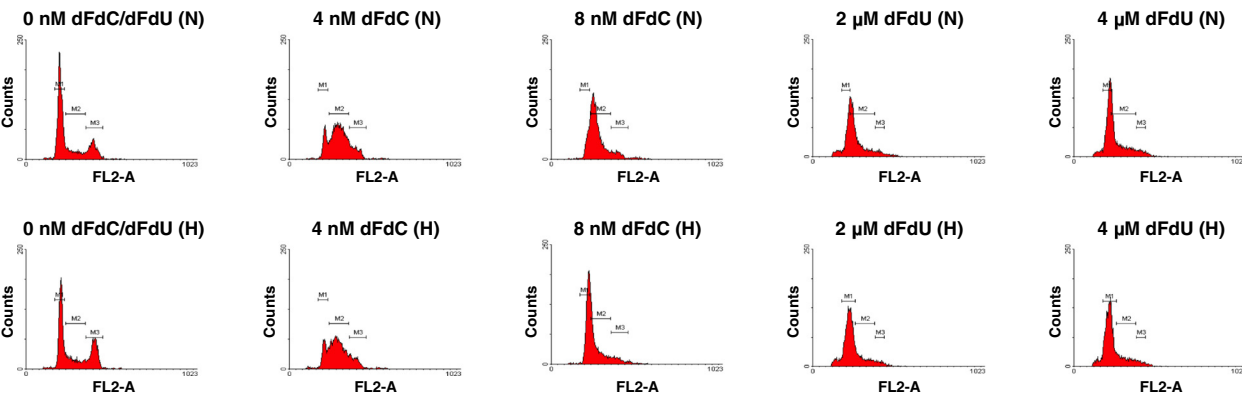

Supplement: MOESM4 [file 9467270]
